# Supplementary material for: Proton transfer and esterification reactions in EMIMOAc-based acidic ionic liquids
Source: Royal Society of Chemistry journal article supplement (doi:10.1039/c7ra00204a), 2017-01-01
Supplement: c7ra00204a1.pdf [file c7ra00204a1.pdf]

## Supplemental Documents

### Proton transfer and esterification reactions in EMIMOAc-based acidic ionic liquids

Anh T. Tran, Phuoc H. Lam, Alexandra M. Miller, Dustin J. Walczyk, Jay Tomlin, Timothy D. Vaden, and Lei Yu\*

Department of Chemistry and Biochemistry, Rowan University, Glassboro, New Jersey 08028, USA

Figures S1 A-D show the spectra of mass spectrometry obtained by GC-MS measurements. The structures of the eluents are identified by comparing the fragmental pattern of the experimental results with the National Institute of Standard and Technology (NIST) data base.

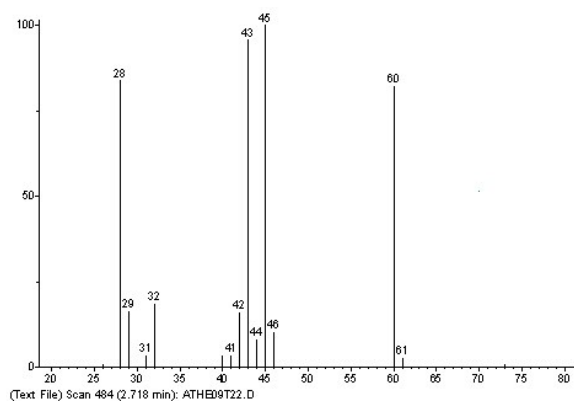

Figure S1 A: Mass spectrum of the eluent identified to be acetic acid.

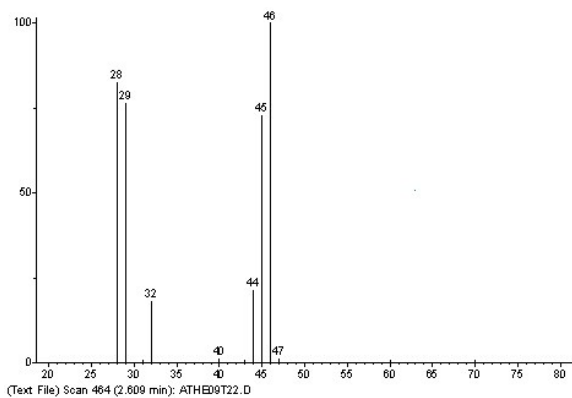

Figure S1 B: Mass spectrum of the eluent identified to be formic acid.

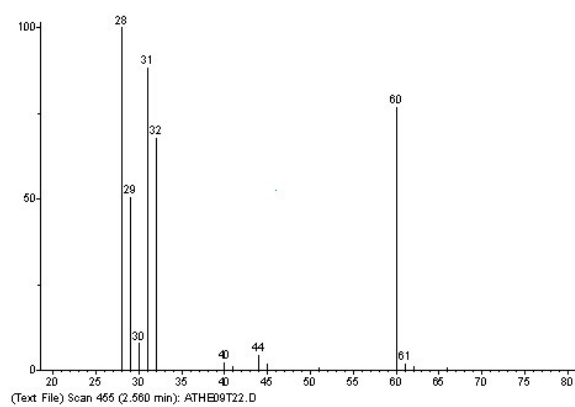

Figure S1 C: Mass spectrum of the eluent identified to be methyl formate.

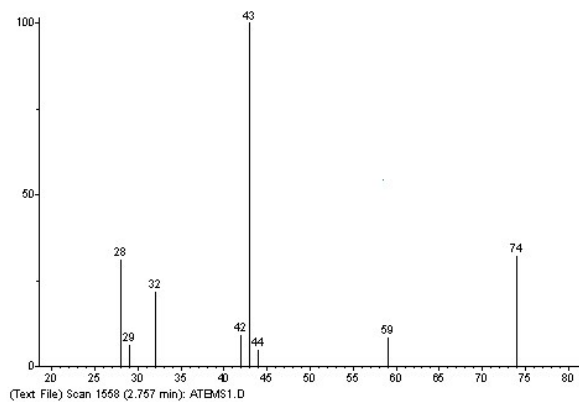

Figure S1 D: Mass spectrum of the eluent identified to be methyl acetate.

Figure S2 shows the FTIR spectra of pure IL EMIMOAc, MSA, and their equal-molar mixture. In addition to the superimposing of the two spectra of the pure compounds, the spectrum of the mixture shows peaks at  $1223\text{ cm}^{-1}$ ,  $1721\text{ cm}^{-1}$  and a shoulder at about  $1750\text{ cm}^{-1}$ , that may indicate the formation of an ester and a carboxylic acid.

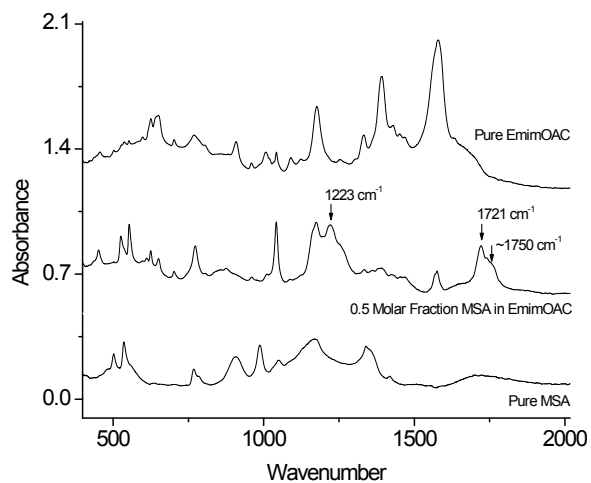

Figure S2: FTIR spectra of pure EMIOAc, pure MSA, and their mixtures at molar ratios of 1:1.
